# Supplementary material for: Isomers in chlorido and alkoxido-substituted oxidorhenium(v) complexes: effects on catalytic epoxidation activity
Source: Royal Society of Chemistry journal article supplement (doi:10.1039/d0dt02352c), 2020-01-01
Supplement: d0dt02352c1.pdf [file d0dt02352c1.pdf]

Supporting Information for

## Isomers in chlorido and alkoxido-substituted oxidorhenium(V) complexes: effects on catalytic epoxidation activity

J. A. Schachner,<sup>\*,†</sup> F. Belaj<sup>†</sup> and N. C. Mösch-Zanetti<sup>†,\*</sup>

<sup>†</sup>Institute of Chemistry, Inorganic Chemistry, University of Graz, Schubertstraße 1, 8010 Graz.

### NMR spectra of complexes *trans*-2a, *cis*-2b and 4b

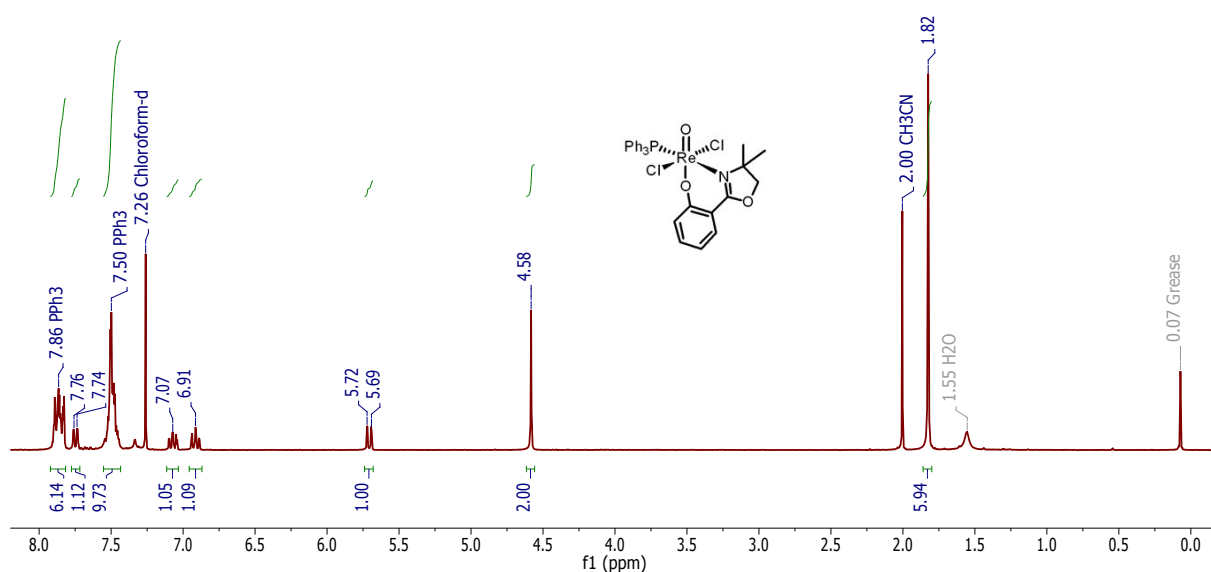

Figure S1. <sup>1</sup>H NMR spectrum of *trans*-[ReOCl<sub>2</sub>(PPh<sub>3</sub>)(L1a)]·CH<sub>3</sub>CN (*trans*-2a) in CDCl<sub>3</sub>.

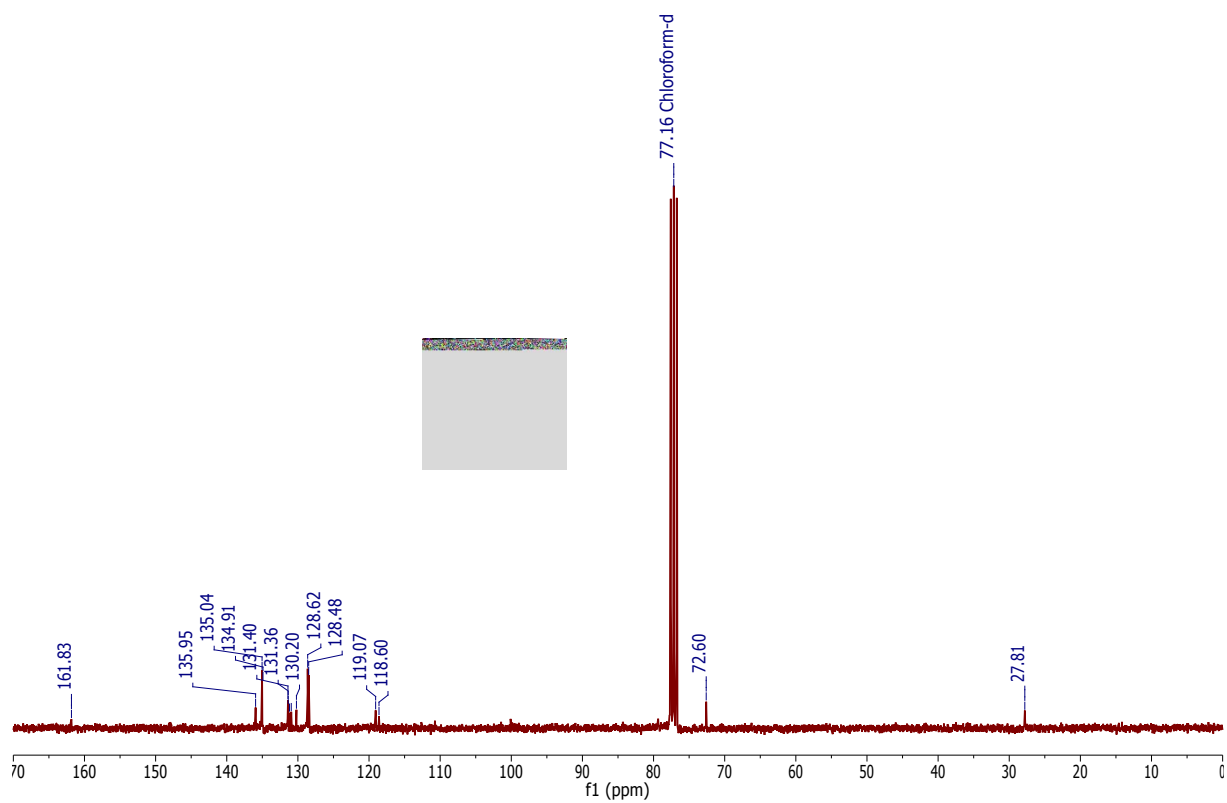

Figure S2.  $^{13}\text{C}$  NMR spectrum of *trans*-[ReOCl<sub>2</sub>(PPh<sub>3</sub>)(L1a)] (*trans*-2a) in CDCl<sub>3</sub>.

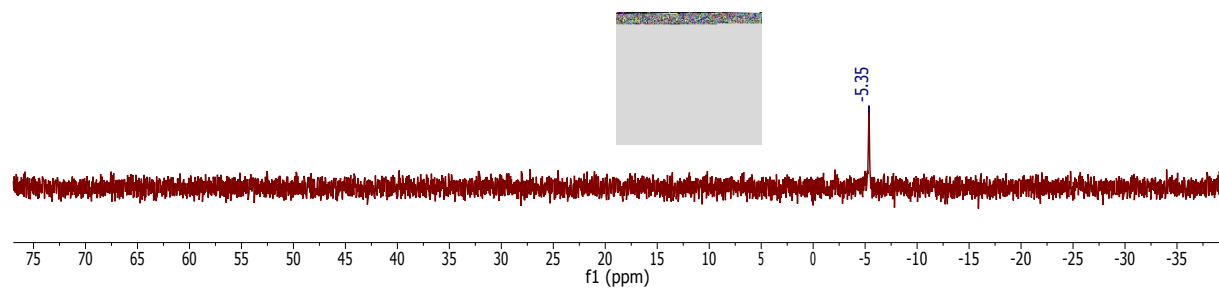

Figure S3.  $^{31}\text{P}$  NMR spectrum of *trans*-[ReOCl<sub>2</sub>(PPh<sub>3</sub>)(L1a)] (*trans*-2a) in CDCl<sub>3</sub>.

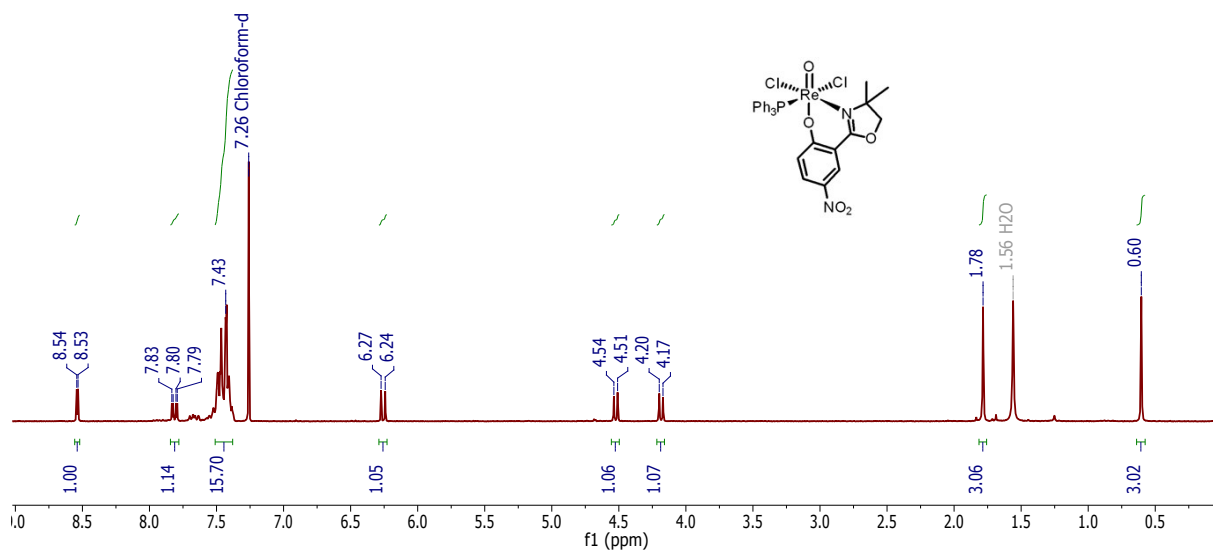

Figure S4.  $^1\text{H}$  NMR spectrum of  $[\text{ReOCl}_2(\text{PPh}_3)(\text{L1b})]$  (*cis*-**2b**) in  $\text{CDCl}_3$ .

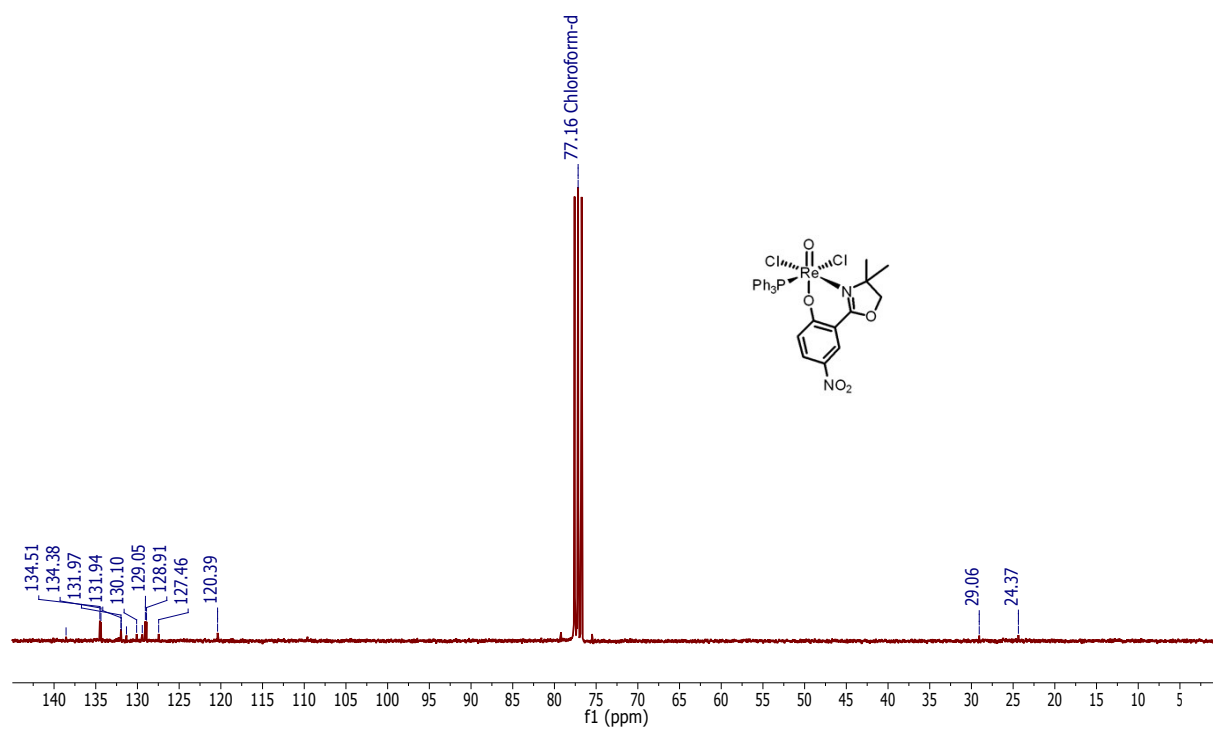

Figure S5.  $^{13}\text{C}$  NMR spectrum of  $[\text{ReOCl}_2(\text{PPh}_3)(\text{L1b})]$  (*cis*-**2b**) in  $\text{CDCl}_3$ .

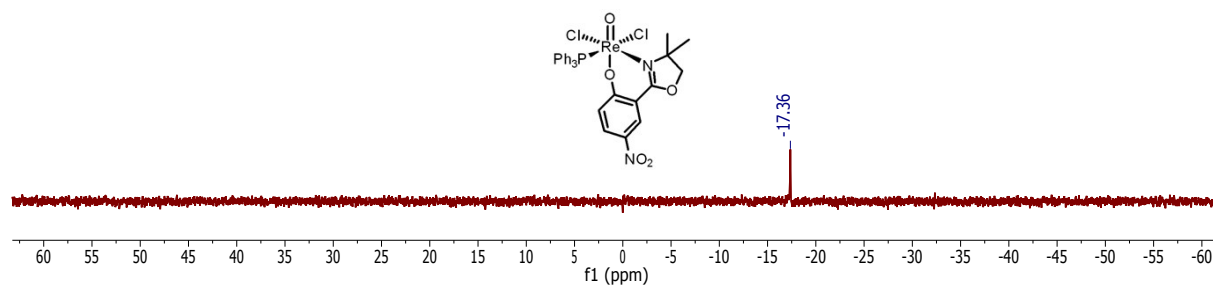

Figure S6.  $^{31}\text{P}$  NMR spectrum of  $[\text{ReOCl}_2(\text{PPh}_3)(\text{L1b})]$  (*cis*-**2b**) in  $\text{CDCl}_3$ .

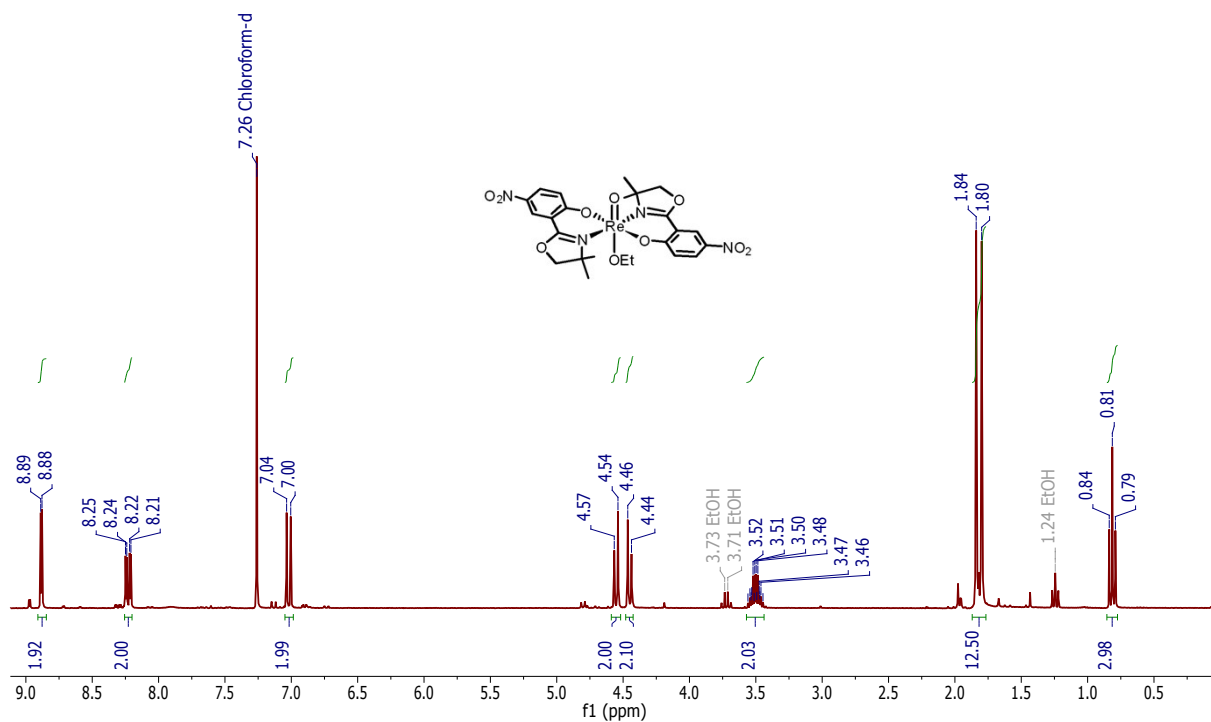

Figure S7.  $^1\text{H}$  NMR spectrum of  $[\text{ReO}(\text{OEt})(\text{L1b})_2]$  (**4b**) in  $\text{CDCl}_3$ .

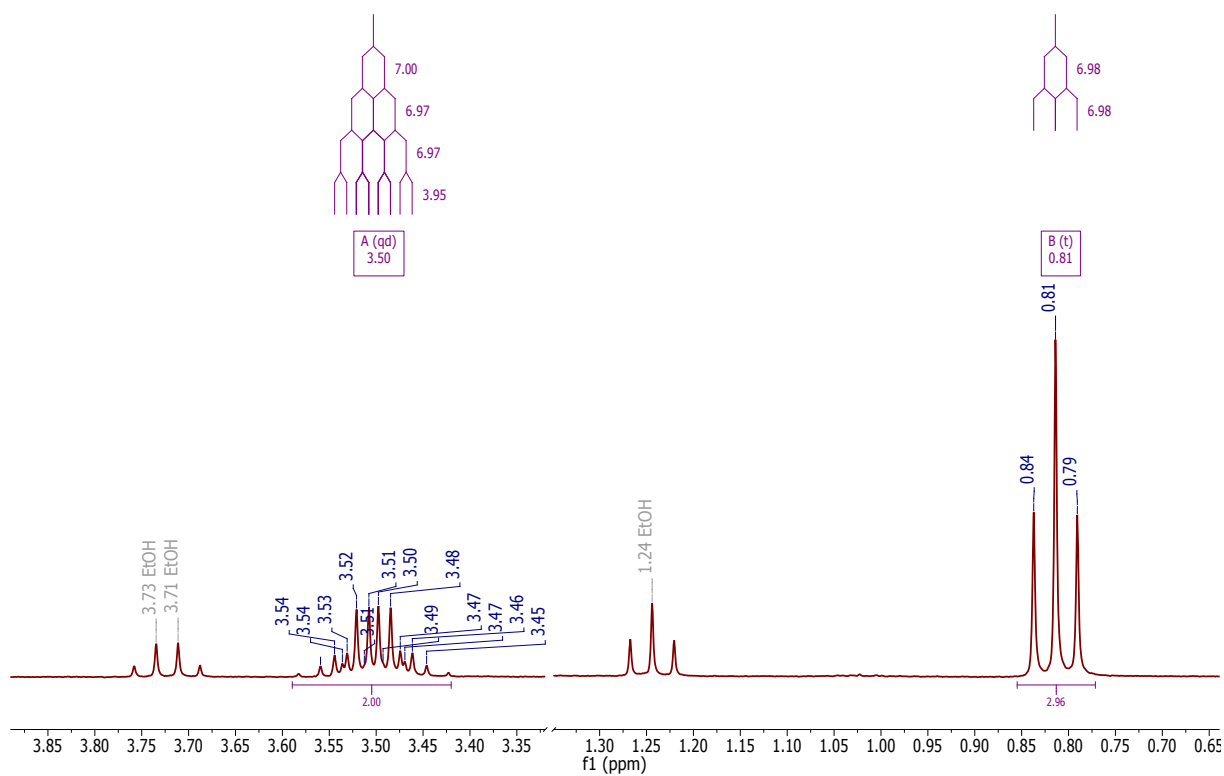

Figure S8.  $^1\text{H}$  NMR spectrum of complex  $[\text{ReOCl}(\text{OEt})(\text{L1b})_2]$  showing the qd and t peaks of the ethoxido ligand (**4b**); peaks for residual EtOH solvent (3.73 and 1.24 ppm) showing the expected q and t peaks are labelled in grey.

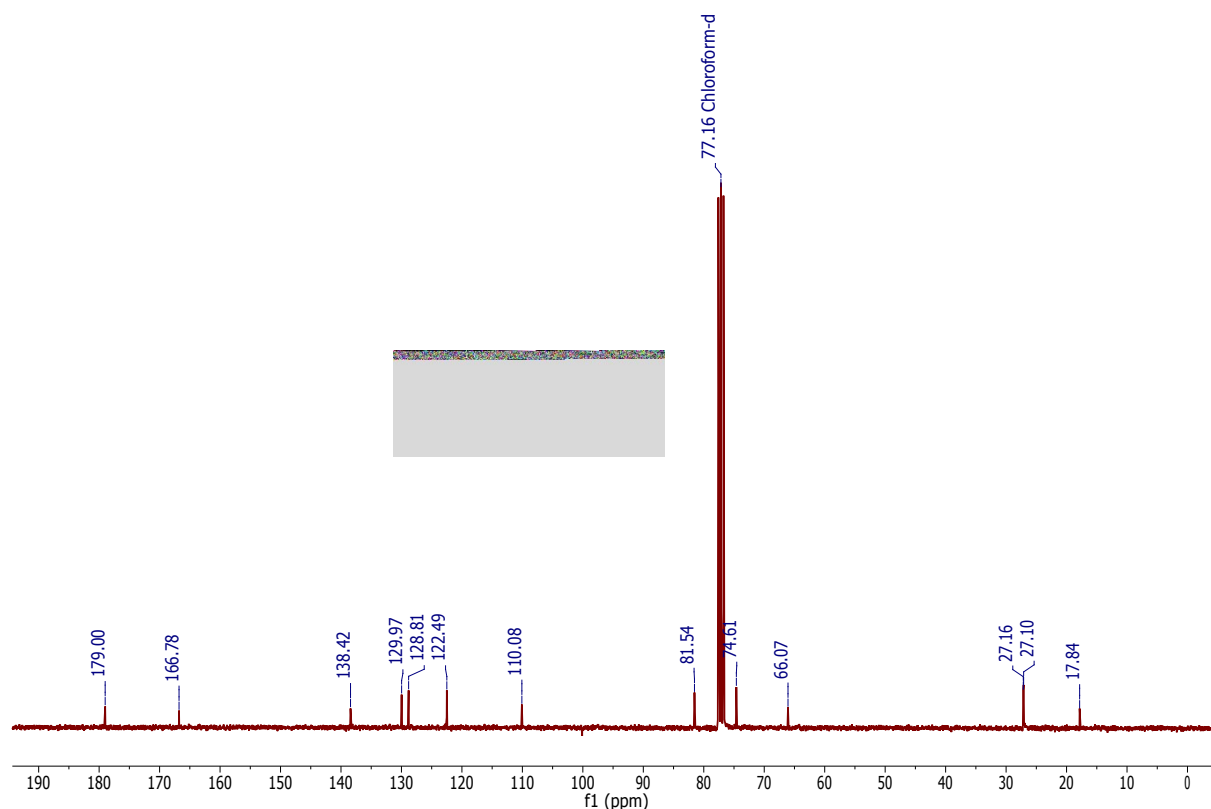

Figure S9.  $^{13}\text{C}$  NMR spectrum of  $[\text{ReO}(\text{OEt})(\text{L1b})_2]$  (**4b**) in  $\text{CDCl}_3$ .

## Cyclovoltammetry

To analyze the electronic situation of the rhenium center directly, complexes *cis-2a*, *trans-2a*, *cis-2b*, **4a** and **4b** were subjected to electrochemical measurements via cyclovoltammetry (CV). Electrochemical data for **3a/b** has been previously published.<sup>1</sup> Solvent used for all measurements was dry acetonitrile (stored over molecular sieves, analyte concentration was 1 mM), with  $(\text{NBu}_4)\text{PF}_6$  (0.1 M) as the supporting electrolyte. All measurements were performed in a glove box under inert  $\text{N}_2$  atmosphere, with a three electrode set-up (working: Pt; supporting: Pt-wire; reference:  $\text{Ag}/0.01\text{M AgNO}_3$  in acetonitrile, 0.1 M  $(\text{NBu}_4)\text{PF}_6$ ). As previously observed for other mono-ligated oxorhenium(V) complexes,<sup>2</sup> all three complexes *cis/trans-2a* and *cis-2b* only showed several irreversible faradaic processes. The same behavior was observed for alkoxido complexes **4a** and **4b**. For **4a**, after the CV measurements, a slow de-coloration (over four hours) of the initially blue-green analyte solution to yellow was observed, indicating decomposition to unknown products. Measurements of complex **4b** were plagued by incomplete dissolution in  $\text{CH}_3\text{CN}$ . Even addition of 10 vol% of dry  $\text{CH}_2\text{Cl}_2$  to the electrochemical cell did not allow to obtain meaningful voltammograms of **4b**. The observed instability of **4a** was somewhat surprising as the complex is stable over 24 h

when dissolved in  $\text{CD}_3\text{CN}$ . Potentially the addition of the 100-fold excess of the electrolyte  $(\text{NBu}_4)\text{PF}_6$  caused the decomposition under CV conditions.

## Crystal structure determinations

The single crystal measurements were performed on a Bruker APEX-II CCD diffractometer at 100 K using Mo K $\alpha$  radiation with a wavelength of 0.71073 Å from an Incoatec microfocus sealed tube equipped with a multilayer monochromator. Absorption corrections were made semi-empirically from equivalents. The structures were solved by direct methods (SHELXS-97)<sup>3</sup> and refined by full-matrix least-squares techniques against  $F^2$  (SHELXL-2014/6)<sup>4</sup>. A weighting scheme of  $w = 1/[\sigma^2(F_o^2) + (aP)^2 + bP]$  was used where  $P = (F_o^2 + 2F_c^2)/3$ . The non-hydrogen atoms of the metal complexes were refined with anisotropic displacement parameters without any constraints. The acetonitrile molecule of *trans*-**2a** lying around a center of symmetry and disordered over two orientations was refined with site occupation factors of 0.5 as a rigid body. The H atoms of the aromatic rings were put at the external bisectors of the C–C–C angles at C–H distances of 0.95 Å and common isotropic displacement parameters were refined for the H atoms of the same ring. The H atoms of the CH<sub>2</sub> groups were refined with common isotropic displacement parameters for the H atoms of the same group and idealized geometries with approx. tetrahedral angles and C–H distances of 0.99 Å. The H atoms of the methyl groups were refined with common isotropic displacement parameters for the H atoms of the same group and idealized geometries with tetrahedral angles, enabling rotation around the C–C bonds, and C–H distances of 0.98 Å. The largest peaks in final difference Fourier maps (1.29–2.73 eÅ<sup>-3</sup>) were in the vicinities (0.65–1.26 Å) of the Re atoms. Crystal data, data collection parameters and structure refinement details are listed in Table S1. Further refinement information, structure and bonding parameters, SHELXL .res and .hkl files are given in the deposited CIF file which is available free of charge from The Cambridge Crystallographic Data Centre (CCDC 1854788–1854789, 2011198).

Table S1. Crystal data and structure refinement for *trans-2a* and *cis-2a*.

| <b>Crystal data</b>                   | <i>trans-2a</i>                          | <i>cis-2a</i>                       |
|---------------------------------------|------------------------------------------|-------------------------------------|
| CIF data code                         | JS31                                     | JS31A                               |
| Empirical formula                     | $2C_{29}H_{27}Cl_2NO_3PRe \cdot C_2H_3N$ | $C_{29}H_{27}Cl_2NO_3PRe$           |
| Formula weight                        | 1492.22                                  | 725.58                              |
| Crystal description                   | block, green                             | plate, green                        |
| Crystal size                          | 0.15 x 0.12 x 0.12mm                     | 0.21 x 0.10 x 0.05mm                |
| Temperature                           | 100K                                     | 100K                                |
| Crystal system                        | triclinic                                | triclinic                           |
| Space group                           | P -1                                     | P -1                                |
| a                                     | 10.1415(4)Å                              | 9.945(2)Å                           |
| b                                     | 11.3165(5)Å                              | 10.196(2)Å                          |
| c                                     | 14.1899(6)Å                              | 14.358(3)Å                          |
| $\alpha$                              | 81.0109(14)°                             | 79.637(3)°                          |
| $\beta$                               | 70.7506(13)°                             | 79.537(2)°                          |
| $\gamma$                              | 64.3553(12)°                             | 69.695(2)°                          |
| Volume                                | 1385.85(10)Å <sup>3</sup>                | 1331.8(5)Å <sup>3</sup>             |
| Z                                     | 1                                        | 2                                   |
| Calc. density                         | 1.788Mg/m <sup>3</sup>                   | 1.809Mg/m <sup>3</sup>              |
| F(000)                                | 734                                      | 712                                 |
| Linear absorption coefficient $\mu$   | 4.669mm <sup>-1</sup>                    | 4.856mm <sup>-1</sup>               |
| Max. and min. transmission            | 0.837 and 0.719                          | 1.000 and 0.545                     |
| Unit cell determination               | $2.38^\circ < \Theta < 30.97^\circ$      | $2.44^\circ < \Theta < 30.42^\circ$ |
| Reflections used                      | 9876                                     | 9524                                |
| <b>Data collection</b>                |                                          |                                     |
| $\Theta$ range for data collection    | 2.00 to 30.00°                           | 2.20 to 30.00°                      |
| Reflections collected/ unique         | 41467 / 8052                             | 25679 / 7766                        |
| Significant unique reflections        | 7792 with $I > 2\sigma(I)$               | 6840 with $I > 2\sigma(I)$          |
| R(int), R(sigma)                      | 0.0245, 0.0159                           | 0.0549, 0.0548                      |
| Completeness to $\Theta_{max}$        | 99.7%                                    | 99.9%                               |
| <b>Refinement</b>                     |                                          |                                     |
| Data/ parameters/ restraints          | 8052 / 360 / 0                           | 7766 / 343 / 0                      |
| Goodness-of-fit on F <sup>2</sup>     | 1.093                                    | 1.045                               |
| Final R indices [ $I > 2\sigma(I)$ ]  | R1 = 0.0167, wR2 = 0.0443                | R1 = 0.0343, wR2 = 0.0809           |
| R indices (all data)                  | R1 = 0.0175, wR2 = 0.0448                | R1 = 0.0431, wR2 = 0.0853           |
| Weighting scheme param. a, b          | 0.0208, 1.6254                           | 0.0278, 4.2745                      |
| Largest $\Delta/\sigma$ in last cycle | 0.002                                    | 0.001                               |
| Largest diff. peak and hole           | 2.199 and -0.947e/Å <sup>3</sup>         | 1.845 and -1.996e/Å <sup>3</sup>    |
| <b>CCDC no.</b>                       | 1854788                                  | 1854789                             |



Table S2. Crystal data and structure refinement for *cis-2b*.

| <b>Crystal data</b>                   | <i>cis-2b</i>                                                                     |
|---------------------------------------|-----------------------------------------------------------------------------------|
| CIF data code                         | JS90                                                                              |
| Empirical formula                     | C <sub>29</sub> H <sub>26</sub> Cl <sub>2</sub> N <sub>2</sub> O <sub>5</sub> Pre |
| Formula weight                        | 770.59                                                                            |
| Crystal description                   | block, green                                                                      |
| Crystal size                          | 0.33 x 0.26 x 0.23mm                                                              |
| Temperature                           | 100K                                                                              |
| Crystal system                        | triclinic                                                                         |
| Space group                           | P -1                                                                              |
| a                                     | 10.7088(4)Å                                                                       |
| b                                     | 10.7534(4)Å                                                                       |
| c                                     | 12.8027(5)Å                                                                       |
| $\alpha$                              | 77.6402(17)°                                                                      |
| $\beta$                               | 87.6176(18)°                                                                      |
| $\gamma$                              | 82.1537(18)°                                                                      |
| Volume                                | 1426.54(9)Å <sup>3</sup>                                                          |
| Z                                     | 2                                                                                 |
| Calc. density                         | 1.794Mg/m <sup>3</sup>                                                            |
| F(000)                                | 756                                                                               |
| Linear absorption coefficient $\mu$   | 4.545mm <sup>-1</sup>                                                             |
| Max. and min. transmission            | 0.746 and 0.426                                                                   |
| Unit cell determination               | 2.27° < $\Theta$ < 30.03°                                                         |
| Reflections used                      | 9993                                                                              |
| <b>Data collection</b>                |                                                                                   |
| $\Theta$ range for data collection    | 1.92 to 30.00°                                                                    |
| Reflections collected/ unique         | 55063 / 8300                                                                      |
| Significant unique reflections        | 7645 with I > 2 $\sigma$ (I)                                                      |
| R(int), R(sigma)                      | 0.0783, 0.0529                                                                    |
| Completeness to $\Theta_{\max}$       | 99.9%                                                                             |
| <b>Refinement</b>                     |                                                                                   |
| Data/ parameters/ restraints          | 8300 / 370 / 0                                                                    |
| Goodness-of-fit on F <sup>2</sup>     | 1.083                                                                             |
| Final R indices [I > 2 $\sigma$ (I)]  | R1 = 0.0297, wR2 = 0.0627                                                         |
| R indices (all data)                  | R1 = 0.0327, wR2 = 0.0636                                                         |
| Weighting scheme param. a, b          | 0.0190, 0.4664                                                                    |
| Largest $\Delta/\sigma$ in last cycle | 0.002                                                                             |
| Largest diff. peak and hole           | 2.735 and -2.273e/Å <sup>3</sup>                                                  |
| <b>CCDC no.</b>                       | 2011198                                                                           |

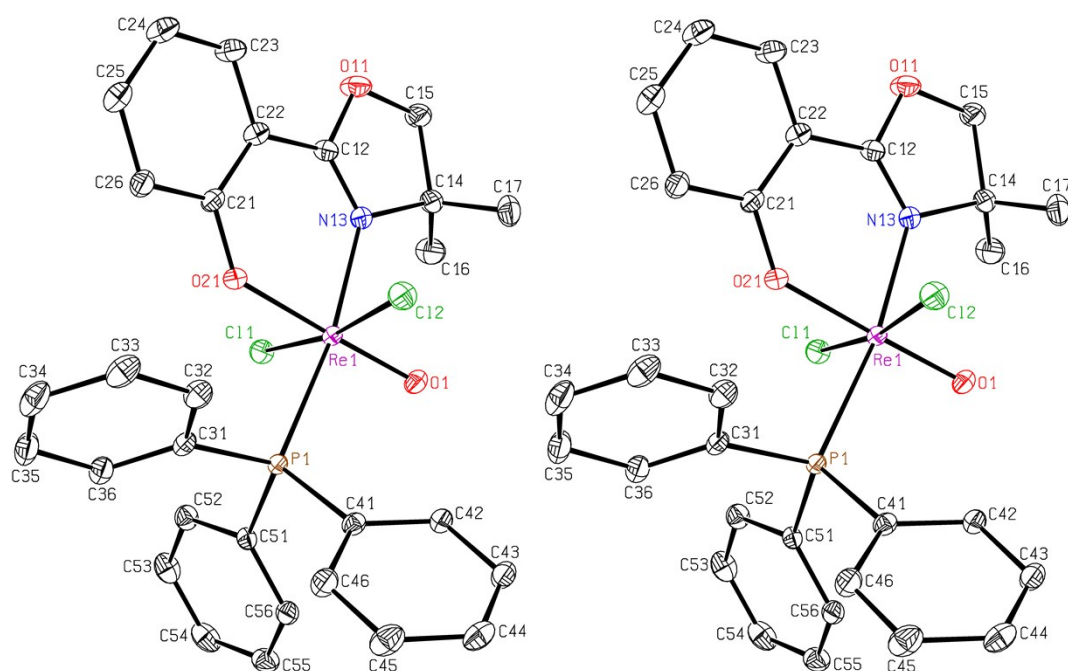

Figure S10. Stereoscopic ORTEP<sup>5</sup> plot of *trans*-**2a** showing the atomic numbering scheme. The probability ellipsoids are drawn at the 50% probability level. The H atoms and the disordered acetonitrile solvent molecule were omitted for clarity.

Table S3. Selected bond lengths [Å] and angles [°] for *trans*-**2a**.

|             |             |                 |             |
|-------------|-------------|-----------------|-------------|
| O1-Re1      | 1.6917(13)  | O1-Re1-P1       | 93.67(5)    |
| Re1-O21     | 1.9481(13)  | O21-Re1-Cl1     | 87.57(4)    |
| Re1-N13     | 2.1423(16)  | O21-Re1-Cl2     | 85.62(4)    |
| Re1-Cl1     | 2.3981(5)   | O21-Re1-N13     | 82.30(6)    |
| Re1-Cl2     | 2.4026(5)   | O21-Re1-P1      | 86.81(4)    |
| Re1-P1      | 2.4723(5)   | C12-N13-C14     | 108.53(16)  |
| C12-N13     | 1.291(2)    | C12-N13-Re1     | 127.05(13)  |
| N13-C14     | 1.508(2)    | C14-N13-Re1     | 124.05(12)  |
| O21-C21     | 1.331(2)    | C21-O21-Re1     | 137.74(12)  |
| P1-C31      | 1.8182(18)  |                 |             |
| P1-C41      | 1.8204(18)  | O11-C12-N13-Re1 | 178.35(13)  |
| P1-C51      | 1.8147(18)  | C22-C12-N13-Re1 | 0.7(3)      |
|             |             | O1-Re1-N13-C12  | -167.98(16) |
| O1-Re1-O21  | 177.71(6)   | O1-Re1-N13-C14  | 4.32(15)    |
| Cl1-Re1-Cl2 | 171.181(16) | Re1-N13-C14-C15 | 176.71(12)  |
| N13-Re1-P1  | 168.60(4)   | P1-Re1-O21-C21  | 152.74(18)  |
| O1-Re1-Cl1  | 94.60(5)    | N13-Re1-O21-C21 | -23.88(20)  |
| O1-Re1-Cl2  | 92.14(5)    | Re1-O21-C21-C26 | -156.12(15) |
| O1-Re1-N13  | 97.08(6)    | Re1-O21-C21-C22 | 24.4(3)     |

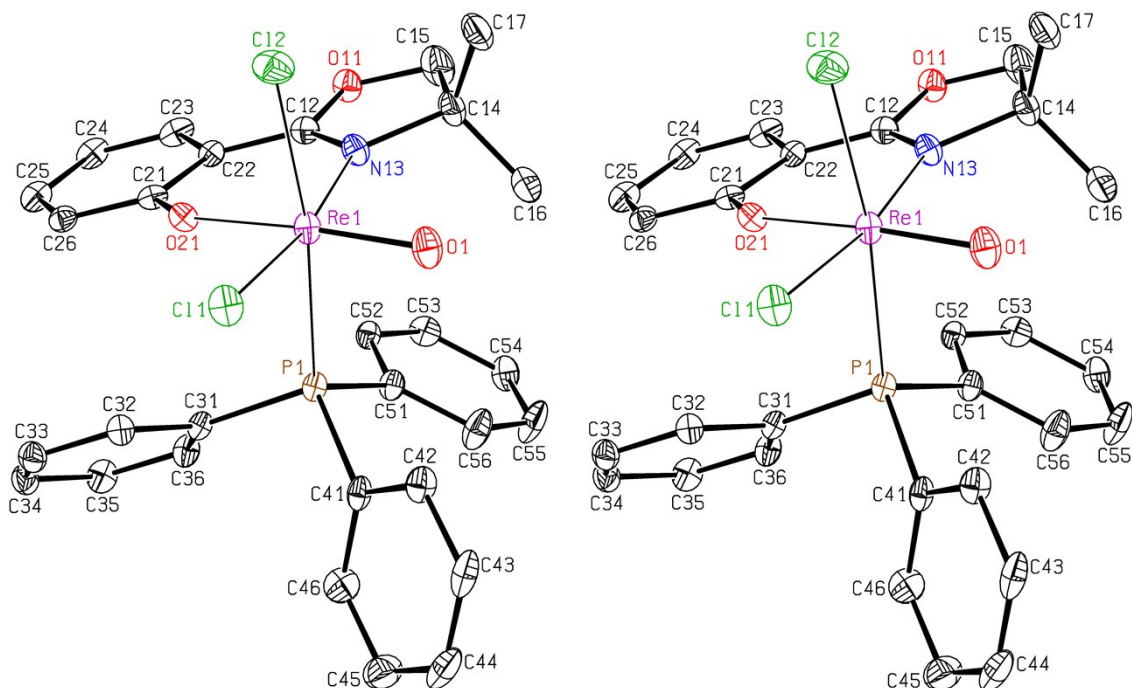

Figure S11. Stereoscopic ORTEP<sup>5</sup> plot of *cis-2a* showing the atomic numbering scheme. The probability ellipsoids are drawn at the 50% probability level. The H atoms were omitted for clarity.

Table S4. Selected bond lengths [Å] and angles [°] for *cis-2a*.

|             |            |                 |           |
|-------------|------------|-----------------|-----------|
| Re1-O1      | 1.684(3)   | O1-Re1-N13      | 90.29(14) |
| Re1-O21     | 1.947(3)   | O1-Re1-P1       | 87.26(11) |
| Re1-N13     | 2.166(3)   | O21-Re1-C11     | 90.63(8)  |
| Re1-C11     | 2.3747(11) | O21-Re1-C12     | 88.23(9)  |
| Re1-C12     | 2.4019(12) | O21-Re1-N13     | 82.54(12) |
| Re1-P1      | 2.4961(11) | O21-Re1-P1      | 83.94(8)  |
| C12-N13     | 1.304(5)   | C12-N13-C14     | 108.8(3)  |
| N13-C14     | 1.511(5)   | C12-N13-Re1     | 126.1(3)  |
| O21-C21     | 1.339(4)   | C14-N13-Re1     | 125.0(3)  |
| P1-C31      | 1.824(4)   | C21-O21-Re1     | 139.5(3)  |
| P1-C41      | 1.832(4)   |                 |           |
| P1-C51      | 1.827(4)   | O11-C12-N13-Re1 | 179.4(3)  |
|             |            | C22-C12-N13-Re1 | -2.5(6)   |
| O1-Re1-O21  | 168.16(13) | O1-Re1-N13-C12  | 165.0(4)  |
| C11-Re1-N13 | 171.03(10) | O1-Re1-N13-C14  | -18.5(3)  |
| C12-Re1-P1  | 171.54(4)  | Re1-N13-C14-C15 | -177.9(3) |
| C11-Re1-C12 | 86.39(4)   | Re1-P1-C31-C32  | -48.3(2)  |
| N13-Re1-P1  | 94.54(10)  | Re1-P1-C41-C42  | -8.0(3)   |
| O1-Re1-C11  | 97.37(11)  | Re1-P1-C51-C52  | -76.0(2)  |
| O1-Re1-C12  | 100.93(11) | Re1-P1-C51-C56  | 100.1(2)  |

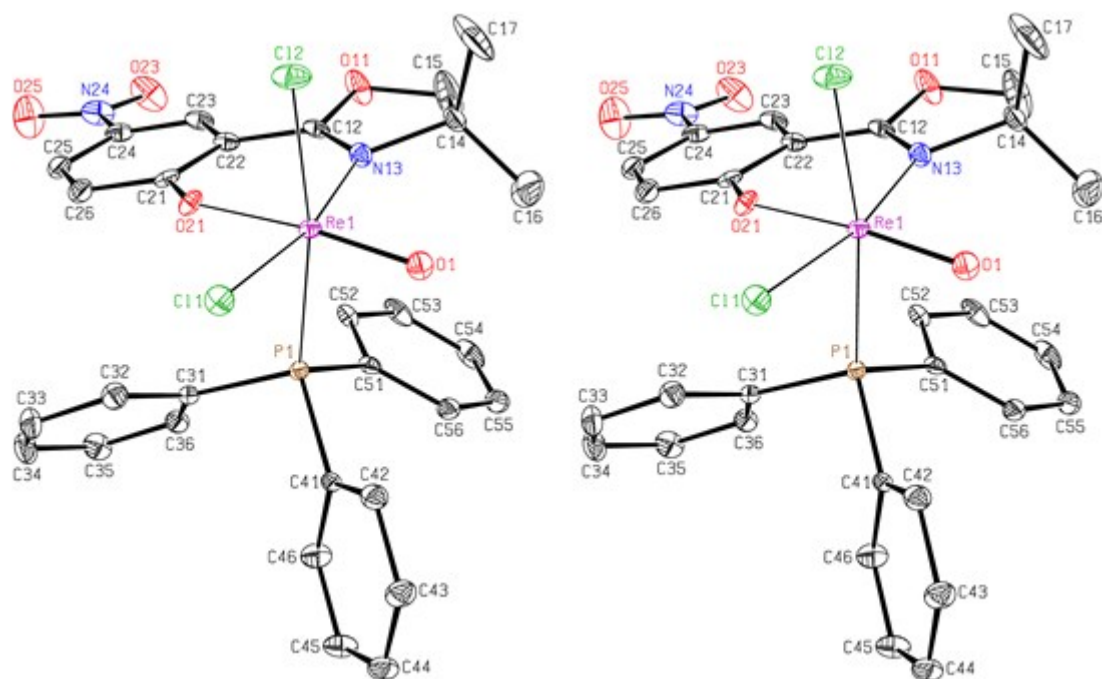

Figure S12. Stereoscopic ORTEP<sup>5</sup> plot of *cis*-**2b** showing the atomic numbering scheme. The probability ellipsoids are drawn at the 50% probability level. The H atoms were omitted for clarity.

Table S5. Selected bond lengths [Å] and angles [°] for *cis*-**2b**.

|             |            |                 |            |
|-------------|------------|-----------------|------------|
| Re1-O1      | 1.6775(19) | O21-Re1-P1      | 82.83(6)   |
| Re1-O21     | 1.9969(18) | N13-Re1-P1      | 93.07(7)   |
| Re1-N13     | 2.155(2)   | Cl1-Re1-P1      | 91.46(2)   |
| Re1-Cl1     | 2.3632(7)  | Cl2-Re1-P1      | 169.80(3)  |
| Re1-C12     | 2.3766(7)  | O1-Re1-Cl2      | 103.84(7)  |
| Re1-P1      | 2.4749(7)  | O21-Re1-Cl2     | 87.16(6)   |
| C12-N13     | 1.290(3)   | N13-Re1-Cl2     | 87.50(7)   |
| N13-C14     | 1.527(4)   | Cl1-Re1-Cl2     | 86.27(3)   |
| O21-C21     | 1.320(3)   | C12-O11-C15     | 106.1(2)   |
| P1-C31      | 1.821(3)   | N13-C12-O11     | 117.0(3)   |
| P1-C41      | 1.827(3)   |                 |            |
| P1-C51      | 1.815(3)   |                 |            |
| O1-Re1-O21  | 167.51(8)  | O11-C12-N13-Re1 | 177.73(19) |
| O1-Re1-N13  | 92.02(9)   | C22-C12-N13-Re1 | -3.1(4)    |
| O21-Re1-N13 | 82.42(8)   | Re1-N13-C14-C17 | -70.5(3)   |
| O1-Re1-Cl1  | 98.31(7)   | Re1-N13-C14-C16 | 54.6(3)    |
| O21-Re1-Cl1 | 88.17(6)   | Re1-N13-C14-C15 | 170.5(2)   |
| N13-Re1-Cl1 | 168.96(6)  | Re1-P1-C31-C32  | -48.3(2)   |
| O1-Re1-P1   | 86.32(7)   | N13-Re1-O21-C21 | 16.5(4)    |
|             |            | Re1-O21-C21-C26 | 164.7(3)   |
|             |            | Re1-O21-C21-C22 | -17.0(6)   |

## References and notes

1. J. A. Schachner, B. Berner, F. Belaj and N. C. Mösch-Zanetti, *Dalton Trans.*, 2019, **48**, 8106-8115.
2. N. Zwettler, J. A. Schachner, F. Belaj and N. C. Mösch-Zanetti, *Inorg. Chem.*, 2014, **53**, 12832–12840.
3. G. M. Sheldrick, *Acta Crystallogr., Sect. A: Found. Crystallogr.*, 2008, **A64**, 112–122.
4. G. M. Sheldrick, *Acta Crystallogr., Sect. C: Cryst. Struct. Chem.*, 2015, **C71**, 3–8.
5. C. K. Johnson, *ORTEP: A FORTRAN Thermal-Ellipsoid Plot Program for Crystal Structure Illustrations: ONRL Report #3794*, Oak Ridge National Laboratory, 1965.
